# Supplementary material for: Design and synthesis of magnesium-modified copper oxide nanosheets as efficient electrocatalysts for CO2 reduction
Source: Royal Society of Chemistry journal article supplement (doi:10.1039/d4nr02240h), 2024-01-01
Supplement: d4nr02240h1.pdf [file d4nr02240h1.pdf]

## Supporting Information

### Design and Synthesis of Magnesium Modified Copper Oxide Nanosheets as Efficient Electrocatalyst for CO<sub>2</sub> Reduction

Xijuan Li<sup>#a</sup>, Zhiqian Li<sup>#b</sup>, Zining Zhang,<sup>b</sup> Yuxiao Zhao,<sup>b</sup> Qi Fang,<sup>b</sup> Jing Tang<sup>\*b,c</sup>,

Jianping He<sup>\*a</sup>

a. College of Materials Science and Technology, Jiangsu Key Laboratory of Electrochemical Energy Storage Technologies, Nanjing University of Aeronautics and Astronautics, Nanjing 210016, China

b. Shanghai Key Laboratory of Green Chemistry and Chemical Processes, School of Chemistry and Molecular Engineering, East China Normal University, Shanghai 200062, China

c. Institute of Eco-Chongming, Shanghai 202162, China

E-mail addresses: [jingtang@chem.ecnu.edu.cn](mailto:jingtang@chem.ecnu.edu.cn); [jianph@nuaa.edu.cn](mailto:jianph@nuaa.edu.cn)

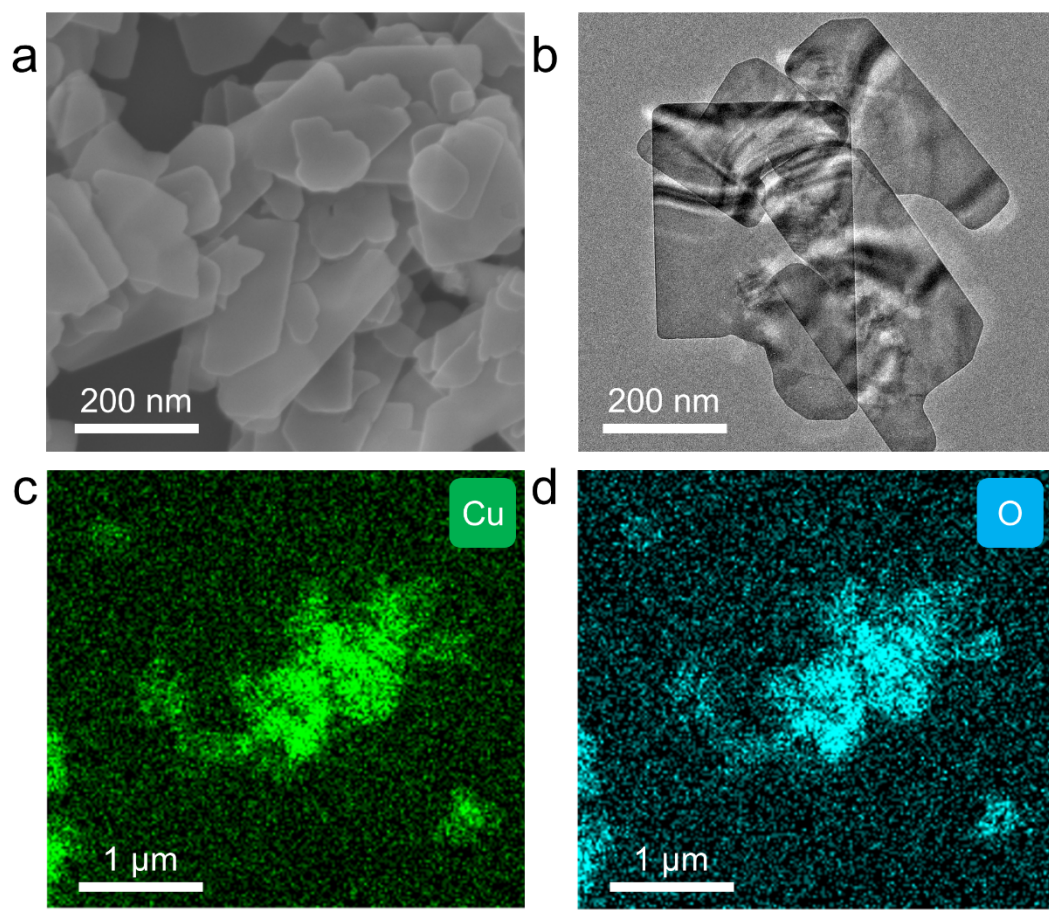

**Fig. S1** (a) The SEM image, (b) The HRTEM image and (c-d) The mapping images of CuO.

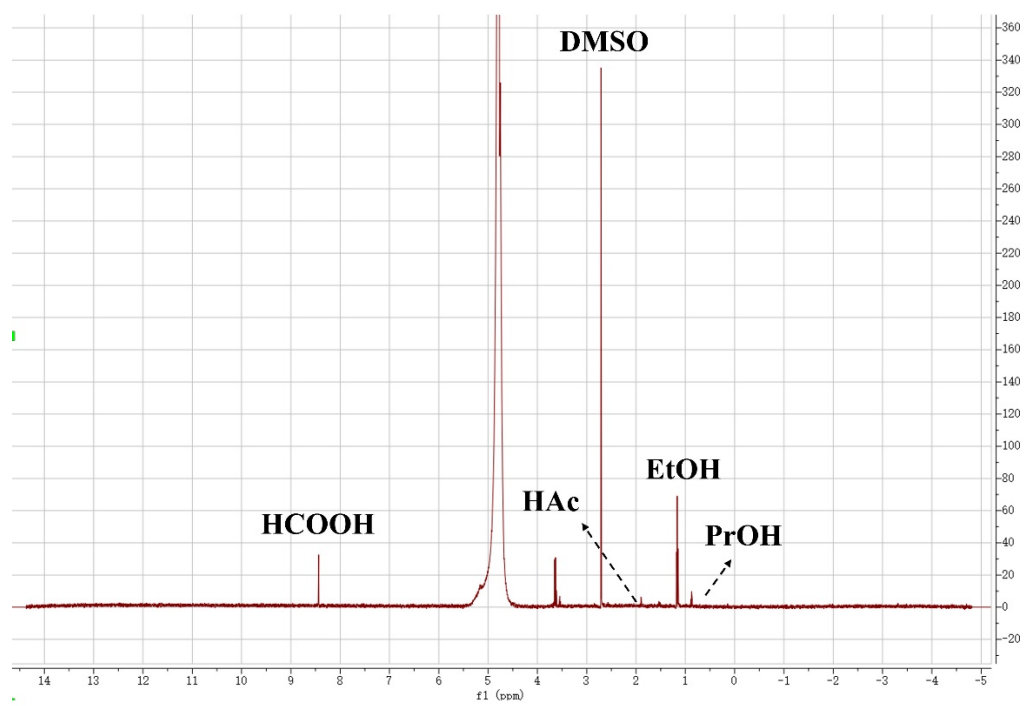

**Fig. S2** NMR spectrum of Mg-CuO-2.

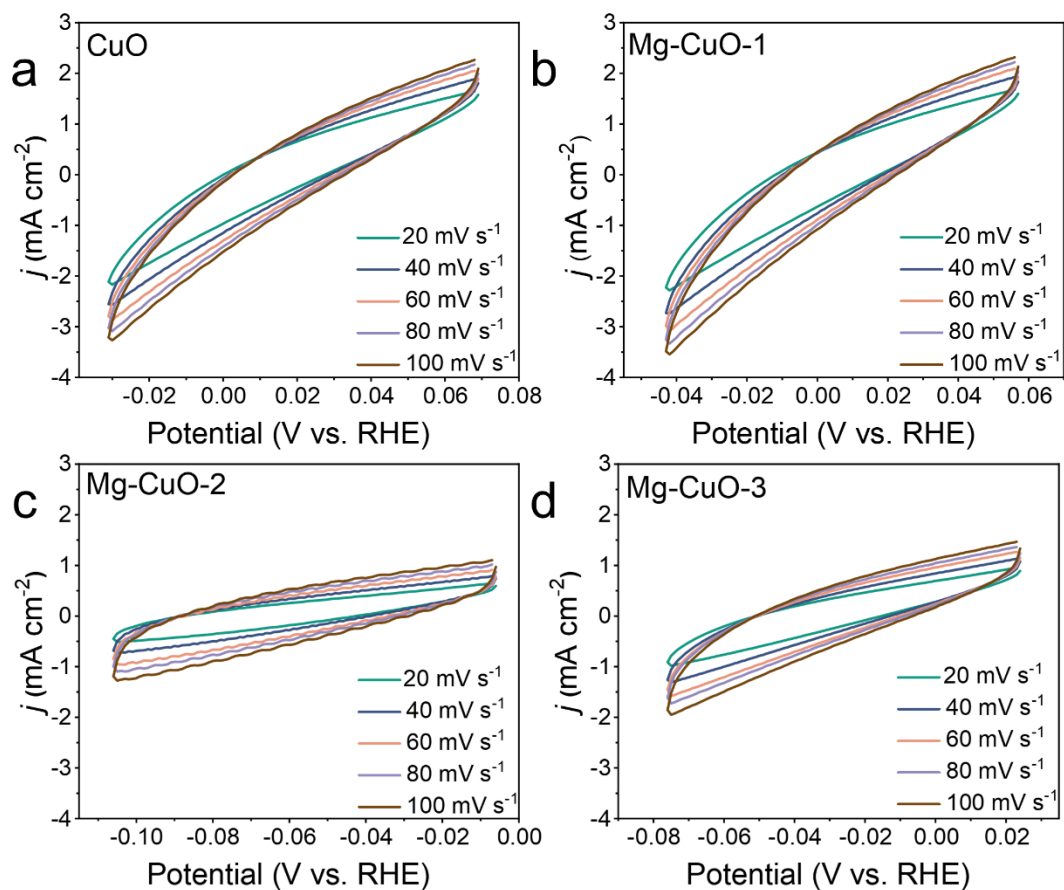

**Fig. S3** Cyclic voltammetry of (a) CuO, (b) Mg-CuO-1, (c) Mg-CuO-2 and (d) Mg-CuO-3 performed in CO<sub>2</sub>-saturated 0.1 M KHCO<sub>3</sub> at various scan rates for measurement of double layer capacity. Cycle voltammetry was carried out under open circuit potential (OCPT)  $\pm$  0.05 V.

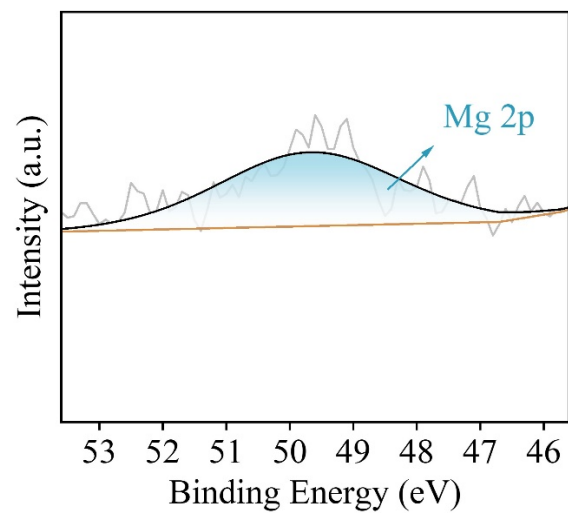

**Fig. S4** XPS spectra of Mg 2p for Mg-CuO-2 after the stability test.

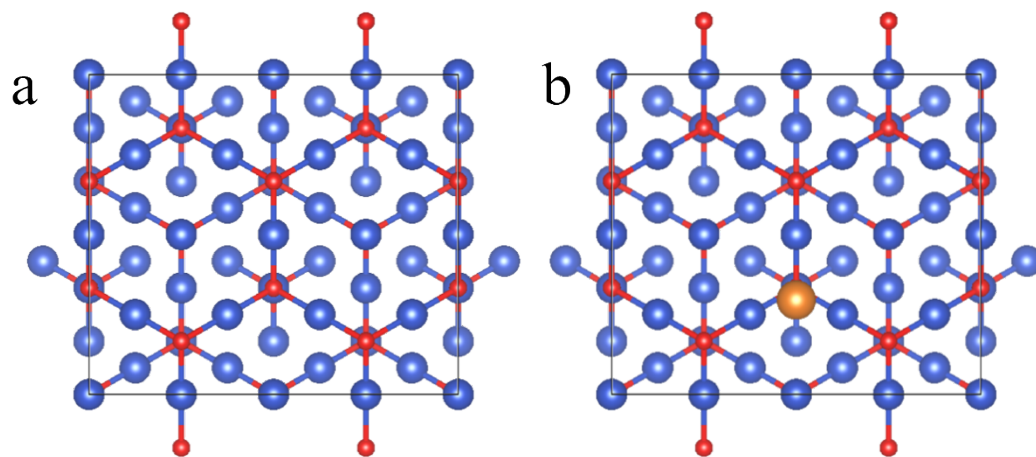

**Fig. S5** Models of (a) Cu<sub>2</sub>O and (b) Mg-Cu<sub>2</sub>O-2 before structural optimization.

**Table S1** The  $FE_{C2+}$  of Mg-CuO-2 at different potentials.

| Potential | $FE_{H2}$ | $FE_{CO}$ | $FE_{CH4}$ | $FE_{HCOOH}$ | $FE_{C2H4}$ | $FE_{C2H5OH}$ | $FE_{CH3COOH}$ | $FE_{C3H8O}$ | $FE_{C2+}$ |
|-----------|-----------|-----------|------------|--------------|-------------|---------------|----------------|--------------|------------|
|           | (%)       | (%)       | (%)        | (%)          | (%)         | (%)           | (%)            | (%)          | (%)        |
| -1.1 V    | 29.10     | 0.04      | 0.85       | 7.54         | 32.51       | 8.21          | 2.14           | 1.85         | 44.71      |
| -1.2 V    | 29.65     | 0.28      | 2.03       | 8.44         | 37.47       | 7.31          | 1.84           | 2.04         | 48.66      |
| -1.3 V    | 25.32     | 0.24      | 1.92       | 8.94         | 46.34       | 13.32         | 1.71           | 1.27         | 62.64      |
| -1.4 V    | 36.23     | 0.37      | 1.46       | 2.87         | 40.36       | 11.48         | 2.57           | 2.41         | 56.82      |
| -1.5 V    | 43.07     | 0.09      | 1.14       | 2.29         | 33.41       | 12.47         | 2.45           | 3.52         | 51.85      |

**Table S2** The products formation rate of Mg-CuO-2 at different potentials.

| Potential | H <sub>2</sub>        | CO                    | CH <sub>4</sub>       | HCOOH                 | C <sub>2</sub> H <sub>4</sub> | C <sub>2</sub> H <sub>5</sub> OH | CH <sub>3</sub> COOH  | C <sub>3</sub> H <sub>8</sub> O |
|-----------|-----------------------|-----------------------|-----------------------|-----------------------|-------------------------------|----------------------------------|-----------------------|---------------------------------|
|           | (mol/h)               | (mol/h)               | (mol/h)               | (mol/h)               | (mol/h)                       | (mol/h)                          | (mol/h)               | (mol/h)                         |
| -1.1 V    | 1.46*10 <sup>-4</sup> | 2.01*10 <sup>-7</sup> | 1.07*10 <sup>-6</sup> | 3.79*10 <sup>-5</sup> | 2.72*10 <sup>-5</sup>         | 6.88*10 <sup>-6</sup>            | 1.79*10 <sup>-6</sup> | 1.16*10 <sup>-6</sup>           |
| -1.2 V    | 1.26*10 <sup>-4</sup> | 1.20*10 <sup>-6</sup> | 2.16*10 <sup>-6</sup> | 3.60*10 <sup>-5</sup> | 2.66*10 <sup>-5</sup>         | 5.20*10 <sup>-6</sup>            | 1.31*10 <sup>-6</sup> | 1.09*10 <sup>-6</sup>           |
| -1.3 V    | 9.39*10 <sup>-5</sup> | 8.90*10 <sup>-7</sup> | 1.78*10 <sup>-6</sup> | 3.31*10 <sup>-5</sup> | 2.86*10 <sup>-5</sup>         | 8.23*10 <sup>-6</sup>            | 1.06*10 <sup>-6</sup> | 5.88*10 <sup>-7</sup>           |
| -1.4 V    | 1.13*10 <sup>-4</sup> | 1.15*10 <sup>-6</sup> | 1.13*10 <sup>-6</sup> | 8.92*10 <sup>-6</sup> | 2.09*10 <sup>-5</sup>         | 5.95*10 <sup>-6</sup>            | 1.33*10 <sup>-6</sup> | 9.37*10 <sup>-7</sup>           |
| -1.5 V    | 1.30*10 <sup>-4</sup> | 2.71*10 <sup>-7</sup> | 8.58*10 <sup>-7</sup> | 6.89*10 <sup>-6</sup> | 1.68*10 <sup>-5</sup>         | 6.26*10 <sup>-6</sup>            | 1.23*10 <sup>-6</sup> | 1.32*10 <sup>-6</sup>           |



**Table S3** Comparison of electrocatalytic CO<sub>2</sub>RR performance with reported catalysts.

| Catalyst                                             | Electrolytic cell | Electrolyte             | Potential<br>(V vs. RHE) | Electrode area          | FE <sub>C<sub>2</sub>+</sub><br>(%) | FE <sub>C<sub>2</sub>H<sub>4</sub></sub><br>(%) | Reference |
|------------------------------------------------------|-------------------|-------------------------|--------------------------|-------------------------|-------------------------------------|-------------------------------------------------|-----------|
| Mg-CuO -2                                            | H-cell            | 0.1 M CsI               | -1.30                    | 1.00 cm <sup>2</sup>    | 62.64                               | 46.34                                           | This work |
| B <sub>1</sub> -CuO NS-2                             | H-cell            | 0.1 M KHCO <sub>3</sub> | -1.20                    | 1.00 cm <sup>2</sup>    | 54.78                               | 38.56                                           | [1]       |
| CuO/NG_AN                                            | H-cell            | 0.1 M KHCO <sub>3</sub> | -1.30                    | Ø=10 mm                 | ~34.00                              | ~30.00                                          | [2]       |
| 60-CuO/CeO <sub>2</sub>                              | H-cell            | 0.1 M KHCO <sub>3</sub> | -1.27                    | 1.00 cm <sup>2</sup>    | ~60.00                              | 44.80                                           | [3]       |
| ON-CuO                                               | H-cell            | 0.1 M KHCO <sub>3</sub> | -1.10                    | 0.20 cm <sup>2</sup>    | 77.00                               | 56.00                                           | [4]       |
| CuO spray                                            | H-cell            | 0.1 M KHCO <sub>3</sub> | -1.00                    | 16.00 cm <sup>2</sup>   | ~65.00                              | 48.70                                           | [5]       |
| CuO/CeO <sub>2</sub>                                 | Single cell       | 0.1 M KHCO <sub>3</sub> | -1.40                    | Ø=12 mm                 | 62.20                               | ~35.00                                          | [6]       |
| B-CuO                                                | Flow cell         | 1.0 M KHCO <sub>3</sub> | -1.01                    | -                       | 55.00                               | 40.00                                           | [7]       |
| Cu <sub>2</sub> O film                               | Flow cell         | 0.1 M KHCO <sub>3</sub> | -0.99                    | Ø=10 mm                 | 47.88                               | 38.79                                           | [8]       |
| Cu@Cu <sub>2</sub> (OH) <sub>3</sub> NO <sub>3</sub> | H-cell            | 0.1 M KHCO <sub>3</sub> | -1.213                   | 2.00 cm <sup>2</sup>    | 41.80                               | ~31.00                                          | [9]       |
| Cu@Cu NS-12                                          | H-cell            | 0.1 M KHCO <sub>3</sub> | -1.357                   | 32 × 28 cm <sup>2</sup> | 63.93                               | 40.00                                           | [10]      |

**Table S4** The calculated ECSA of CuO and Mg-CuO-*x*.

| Catalyst | C <sub>dl</sub> (mF) | ECSA (cm <sup>2</sup> ) |
|----------|----------------------|-------------------------|
| CuO      | 2.80                 | 70.00                   |
| Mg-CuO-1 | 2.96                 | 74.00                   |
| Mg-CuO-2 | 3.89                 | 97.20                   |
| Mg-CuO-3 | 3.74                 | 93.50                   |

**Note for Table S4:**

Electrochemical active surface areas (ECSA) are calculated by the following formula:  $ECSA = C_{dl}/C_s$  where  $C_{dl}$  corresponds to the slope of the double-layer charging current versus the scan rate ( $v$ ) plot, we use a specific capacitance ( $C_s$ ) value of  $40 \mu F cm^{-2}$ .

**Table S5** Adsorption energy of \*CO on Cu<sub>2</sub>O and Mg-Cu<sub>2</sub>O-2.

| *CO                   | Cu <sub>2</sub> O (eV) | Mg-Cu <sub>2</sub> O-2 (eV) |
|-----------------------|------------------------|-----------------------------|
| E <sub>CO-total</sub> | -308.22                | -308.15                     |
| E <sub>bare</sub>     | -292.62                | -292.38                     |
| E <sub>CO</sub>       | -14.8                  | -14.8                       |
| E <sub>CO-ad</sub>    | -0.8                   | -0.97                       |

## Reference

- S1. Z. Li, X. Yang, Q. Fang, T. Cheng, Z. Zhang, H. Zhang and J. Tang, *Appl. Surf. Sci.*, 2024, **647**, 158919.
- S2. Z. Tan, T. Peng, X. Tan, W. Wang, X. Wang, Z. Yang, H. Ning, Q. Zhao and M. Wu, *ChemElectroChem*, 2020, **7**, 2020-2025.
- S3. H.-D. Cai, B. Nie, P. Guan, Y.-S. Cheng, X.-D. Xu, F.-H. Wu, G. Yuan and X.-W. Wei, *ACS Appl. Nano Mater.*, 2022, **5**, 7259-7267.
- S4. D. G. Park, J. W. Choi, H. J. Chun, H. S. Jang, H. B. Lee, W. H. Choi, B. C. Moon, K.-H. Kim, M. G. Kim, K. M. Choi, B. C. Han and J. K. Kang, *ACS Catal.*, 2023, **13**, 9222-9233.
- S5. S. Y. Lee, S. Y. Chae, H. Jung, C. W. Lee, D. L. T. Nguyen, H.-S. Oh, B. K. Min and Y. J. Hwang, *J. Mater. Chem. A*, 2020, **8**, 6210-6218.
- S6. Y. Tian, X. Fei, H. Ning, W. Wang, X. Tan, X. Wang, Z. Ma, Z. Guo and M. Wu, *Front. Chem.*, 2022, **10**, 915759.
- S7. K. K. Patra, S. Park, H. Song, B. Kim, W. Kim and J. Oh, *ACS Appl. Energy Mater.*, 2020, **3**, 11343-11349.

- S8. D. Ren, Y. Deng, A. D. Handoko, C. S. Chen, S. Malkhandi and B. S. Yeo, *ACS Catal.*, 2015, **5**, 2814-2821.
- S9. M. Wang, Q. Zhang, Q. Xie, L. Wan, Y. Zhao, X. Zhang and J. Luo, *Nanoscale*, 2020, **12**, 17013-17019.
- S10. M. Wang, L. Wan, J. Cheng and J. Luo, *J. Mater. Chem. A*, 2022, **10**, 14070.
